# Supplementary material
Source: PubMed Central journal article supplement (PMC3893022)
Supplement: NIHMS530999-supplement-1_si_001.pdf [file NIHMS530999-supplement-1_si_001.pdf]

# Supporting Information

## Biomimetic Protein Nanoparticles Facilitate Enhanced Dendritic Cell Activation and Cross-Presentation

*Nicholas M. Molino,<sup>1</sup> Amanda K. L. Anderson,<sup>2,†</sup> Edward L. Nelson,<sup>2</sup>  
and Szu-Wen Wang<sup>1,\*</sup>*

<sup>1</sup>Department of Chemical Engineering and Materials Science, University of California,

916 Engineering Tower, Irvine, CA 92697-2575

<sup>2</sup>Institute for Immunology, University of California, Irvine

\*Corresponding author

phone: 949-824-2383

email: wangsw@uci.edu

<sup>†</sup>Current affiliation: Epic Sciences, 10975 N. Torrey Pines Road, La Jolla, California  
92037

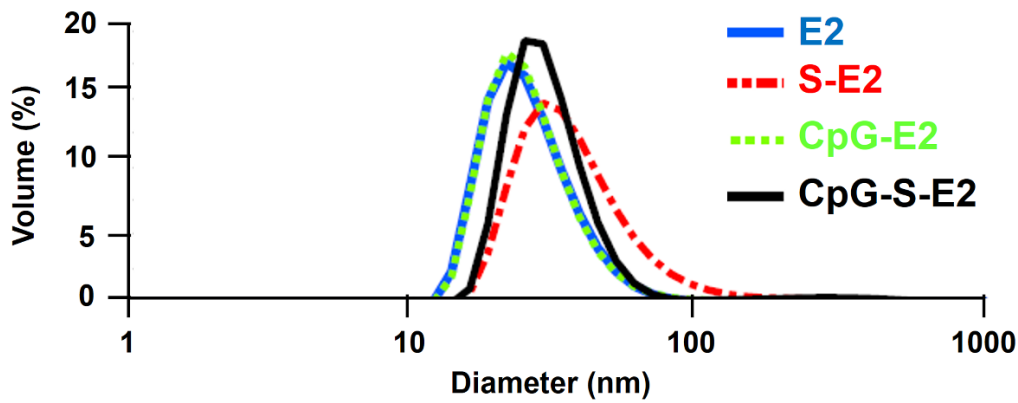

**Figure S1.** Representative dynamic light scattering graph of the functionalized nanoparticles. A total of three independent experiments were carried out on each nanoparticle, with n=3 size measurements for each experiment.

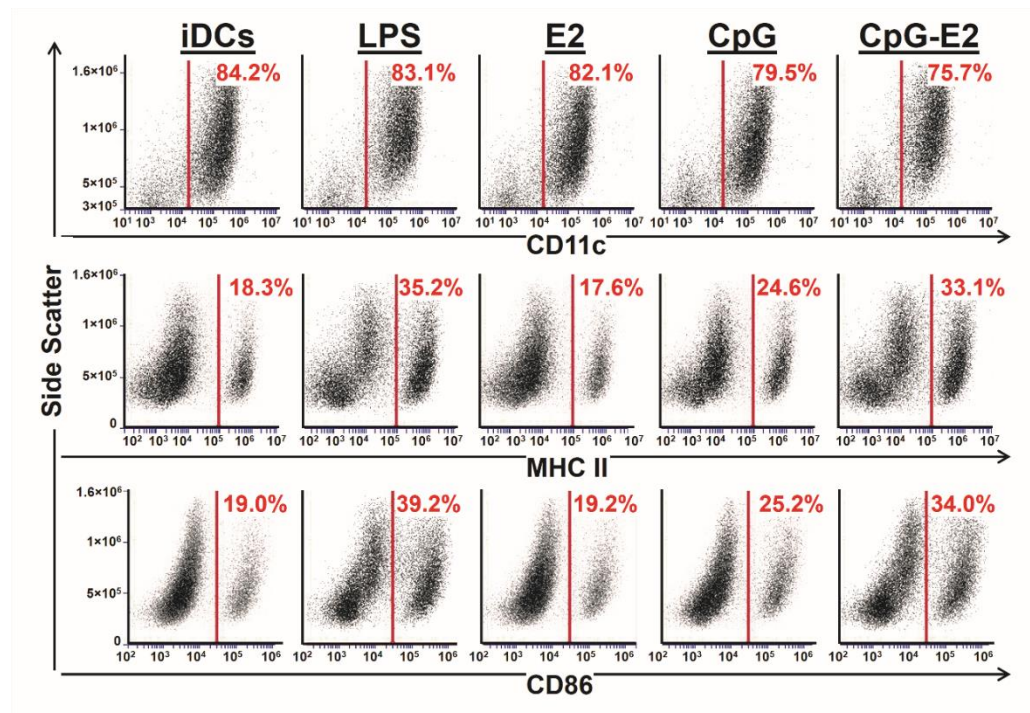

**Figure S2.** A representative BMDC activation experiment analyzed by flow cytometry following 24 hours incubation with E2, CpG-E2, or free CpG (0.5  $\mu\text{g/ml}$  equivalent CpG concentration). Rows display different surface markers, and columns correspond to the different compounds added (iDCs = immature DCs). Events to the right of the red bar are considered positive for the specific marker.

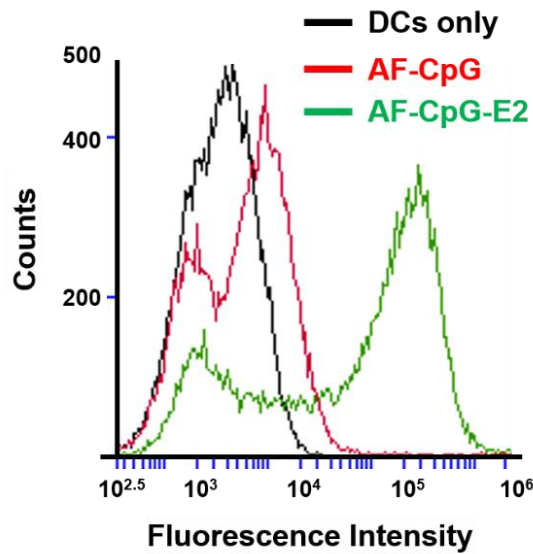

**Figure S3.** BMDCs show increased uptake of E2-encapsulated CpG, relative to unbound CpG. A representative BMDC uptake experiment analyzed by flow cytometry following 2 hours incubation with 0.5  $\mu\text{g/ml}$  Alexa Fluor 488-conjugated CpG (AF-CpG) or Alexa Fluor 488-conjugated CpG-E2 (AF-CpG-E2, 0.5  $\mu\text{g/ml}$  CpG). A shift in the MFI of > 25-fold was observed when incubated with AF-CpG-E2, relative to AF-CpG, indicative of increased uptake.

*Methods for Figure S3:* CpG-E2 (at ~25 CpG molecules per E2 nanoparticle) were reacted with AlexaFluor 488 carboxylic acid succinimidyl ester (Invitrogen) for 1.5 hours at room temperature to yield ~25 dye molecules per E2 nanoparticle (AF-CpG-E2), giving a dye-to-CpG ratio of 1:1. Unbound CpG with a 5' AlexaFluor 488 (AF-CpG) was synthesized by Integrated DNA Technologies at a dye-to-CpG ratio of 1:1. Immature BMDCs harvested on day 8 of culture were incubated with unbound AF-CpG or AF-CpG-E2 particle at equivalent CpG concentrations for 2 hours at 37°C, harvested, and analyzed by flow cytometry. (n=3)

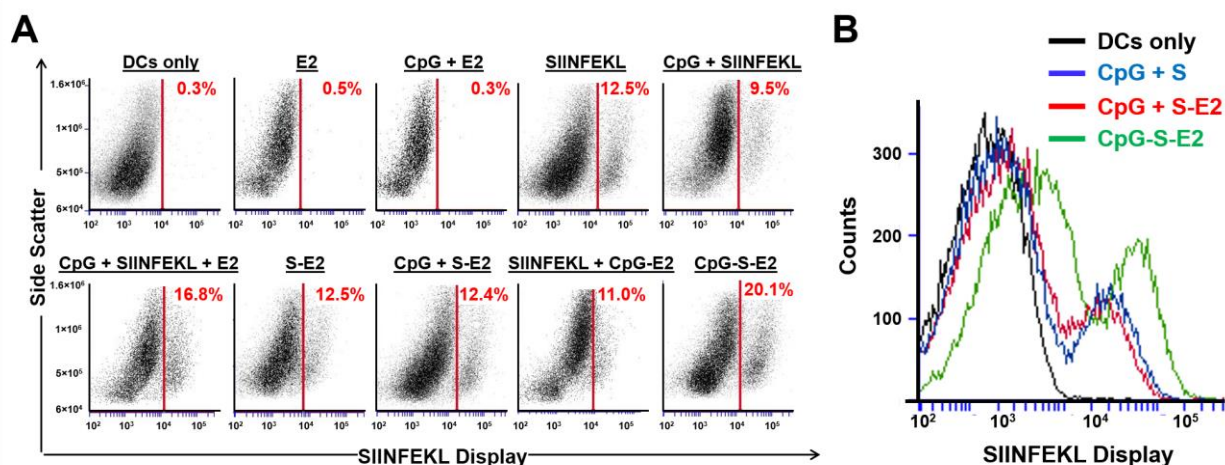

**Figure S4.** Depicted are representative BMDC cross-presentation experiment analyzed by flow cytometry following incubation with antigen (0.5  $\mu\text{g/ml}$  equivalent SIINFEKL concentration) and staining with monoclonal antibody 25-D1.16. A) Representative dot plot with the events to the right of the red bars are considered positive for SIINFEKL display in the context of H-2K<sup>b</sup>. B) Overlay of representative histograms of DCs only, unbound CpG + unbound SIINFEKL (S), unbound CpG + S-E2, and CpG-S-E2.

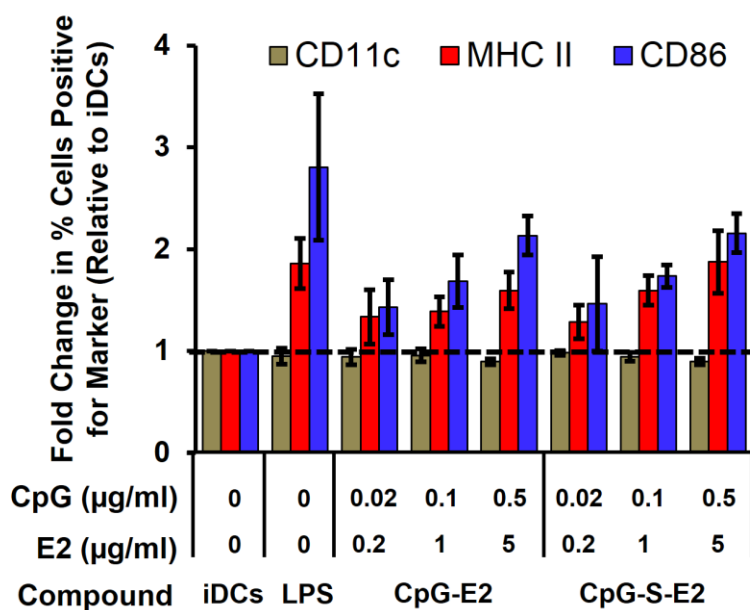

**Figure S5.** No significant difference was observed between the CpG-E2 particle and CpG-S-E2 particle with respect to BMDC activation at a given CpG concentration. Activation extent was determined by measuring MFI for the expression of MHC II and CD86 ( $n \geq 4$  independent experiments).

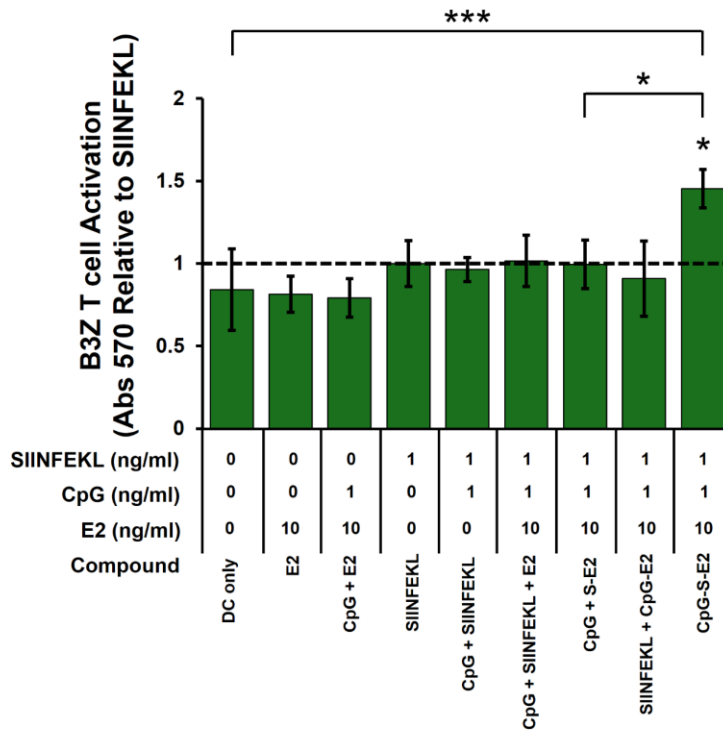

**Figure S6.** BMDC incubated with CpG-S-E2 facilitate greater CD8 T cell activation than any other peptide delivery strategy after 48 hour incubation. Significantly greater B3Z activation was achieved for BMDCs incubated with CpG-S-E2, relative to all unbound SIINFEKL formulations (\*  $p < 0.05$ ). Comparisons with CpG + S-E2 (\*  $p < 0.05$ ) and with DC-only background (\*\*\*)  $p < 0.001$ ) also yielded statistically significant differences. Data is presented as mean  $\pm$  SD ( $n \geq 3$  independent experiments), and significance was determined by a one-way ANOVA followed by a Bonferroni post-test comparing the set of data including DC-only control and all formulations containing peptide.
